# Supplementary material for: Homojunction and defect synergy-mediated electron–hole separation for solar-driven mesoporous rutile/anatase TiO2 microsphere photocatalysts
Source: PubMed Central journal article supplement (PMC9061422; doi:10.1039/c9ra00633h), 2019-03-08
Supplement: RA-009-C9RA00633H-s001.pdf [file RA-009-C9RA00633H-s001.pdf]

Supporting Information

**Homojunction and Defects Synergy-Mediated Electron-Hole  
Separation for Solar-Driven Mesoporous Rutile/Anatase TiO<sub>2</sub>  
Microsphere Photocatalysts**

Haoze Li, Bojing Sun, Fan Yang, Zhen Wang, Yachao Xu, Guohui Tian, Kai Pan,  
Baojiang Jiang and Wei Zhou\*

Key Laboratory of Functional Inorganic Material Chemistry, Ministry of Education of  
the People's Republic of China, Heilongjiang University, Harbin 150080, P. R. China

Email: zwchem@hotmail.com

**Table S1.** Ratio of rutile to anatase of the mesoporous rutile/anatase TiO<sub>2</sub> microspheres after being calcined at different temperatures under hydrogen atmosphere.

|             | Air  | H400 | H500 | H600 |
|-------------|------|------|------|------|
| Anatase (%) | 27.5 | 22.9 | 16.2 | 15.2 |
| Rutile (%)  | 72.5 | 77.1 | 83.8 | 84.8 |

**Table S2.** The textual properties of the mesoporous rutile/anatase TiO<sub>2</sub> microspheres after being calcined at different temperatures under hydrogen atmosphere.

|                                                   | Air  | H400 | H500 | H600 |
|---------------------------------------------------|------|------|------|------|
| Surface Area<br>(m <sup>2</sup> g <sup>-1</sup> ) | 52.6 | 44.1 | 39.2 | 20.3 |
| Pore Size (nm)                                    | 13.8 | 12.5 | 12.2 | 16.5 |
| Pore Volume<br>(cm <sup>3</sup> g <sup>-1</sup> ) | 0.14 | 0.14 | 0.13 | 0.11 |

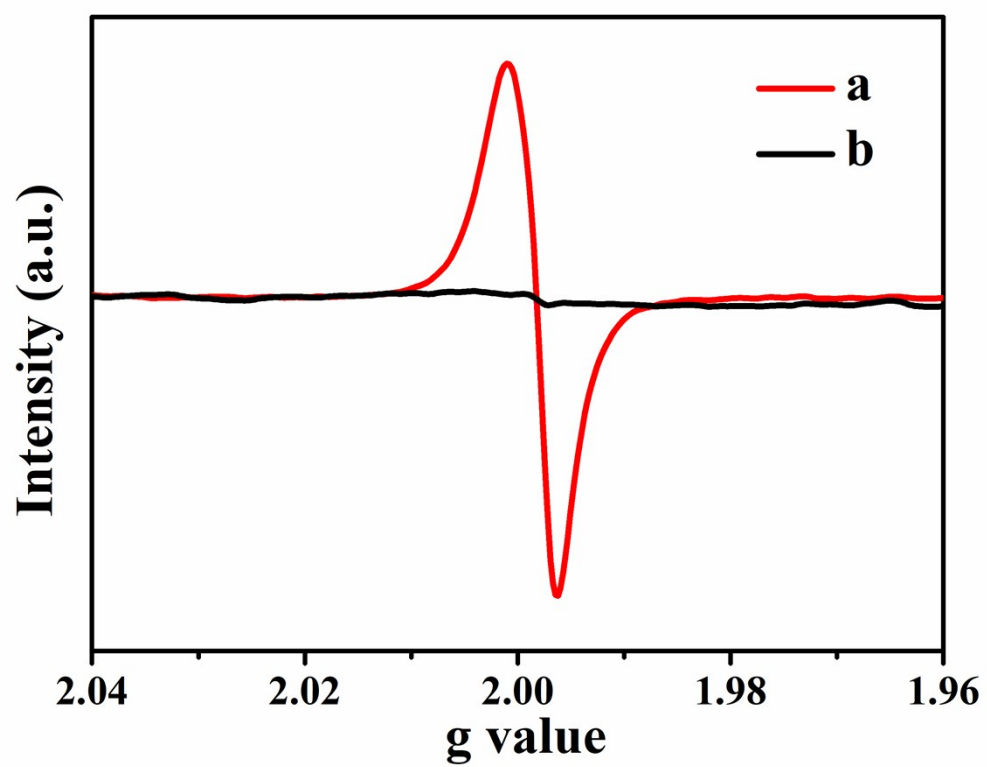

**Figure S1.** The electron paramagnetic resonance (EPR) spectra of MR/ATM (b) and H500-BMR/ATM (a).
